# Supplementary material
Source: PubMed Central journal article supplement (PMC3014266)
Supplement: supp_110.035915_DMD35915_Supplemental_Materal_2.pdf [file supp_110.035915_DMD35915_Supplemental_Materal_2.pdf]

## **Supplementary Data**

### **Whole body physiologically-based pharmacokinetic model for nutlin-3a in mice after intravenous and oral administration**

Fan Zhang, Michael Tagen, Stacy Throm, Jeremy Mallari, Laura Miller, R. Kiplin Guy, Michael A. Dyer, Richard T. Williams, Martine F. Roussel, Katie Nemeth, Fangyi Zhu, Jiakun Zhang, Min Lu, Clinton F. Stewart

Drug Metabolism and Disposition

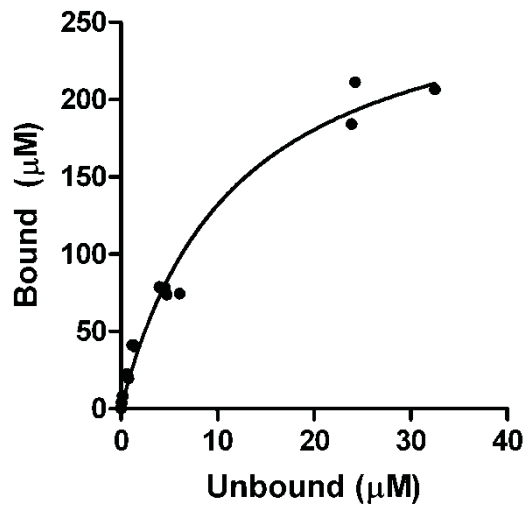

**Supplementary Figure S1.** Nutlin-3a binding to murine plasma proteins. Bound and unbound nutlin-3a plasma concentrations were determined with equilibrium dialysis and nonlinear regression was performed using the Langmuir equation.

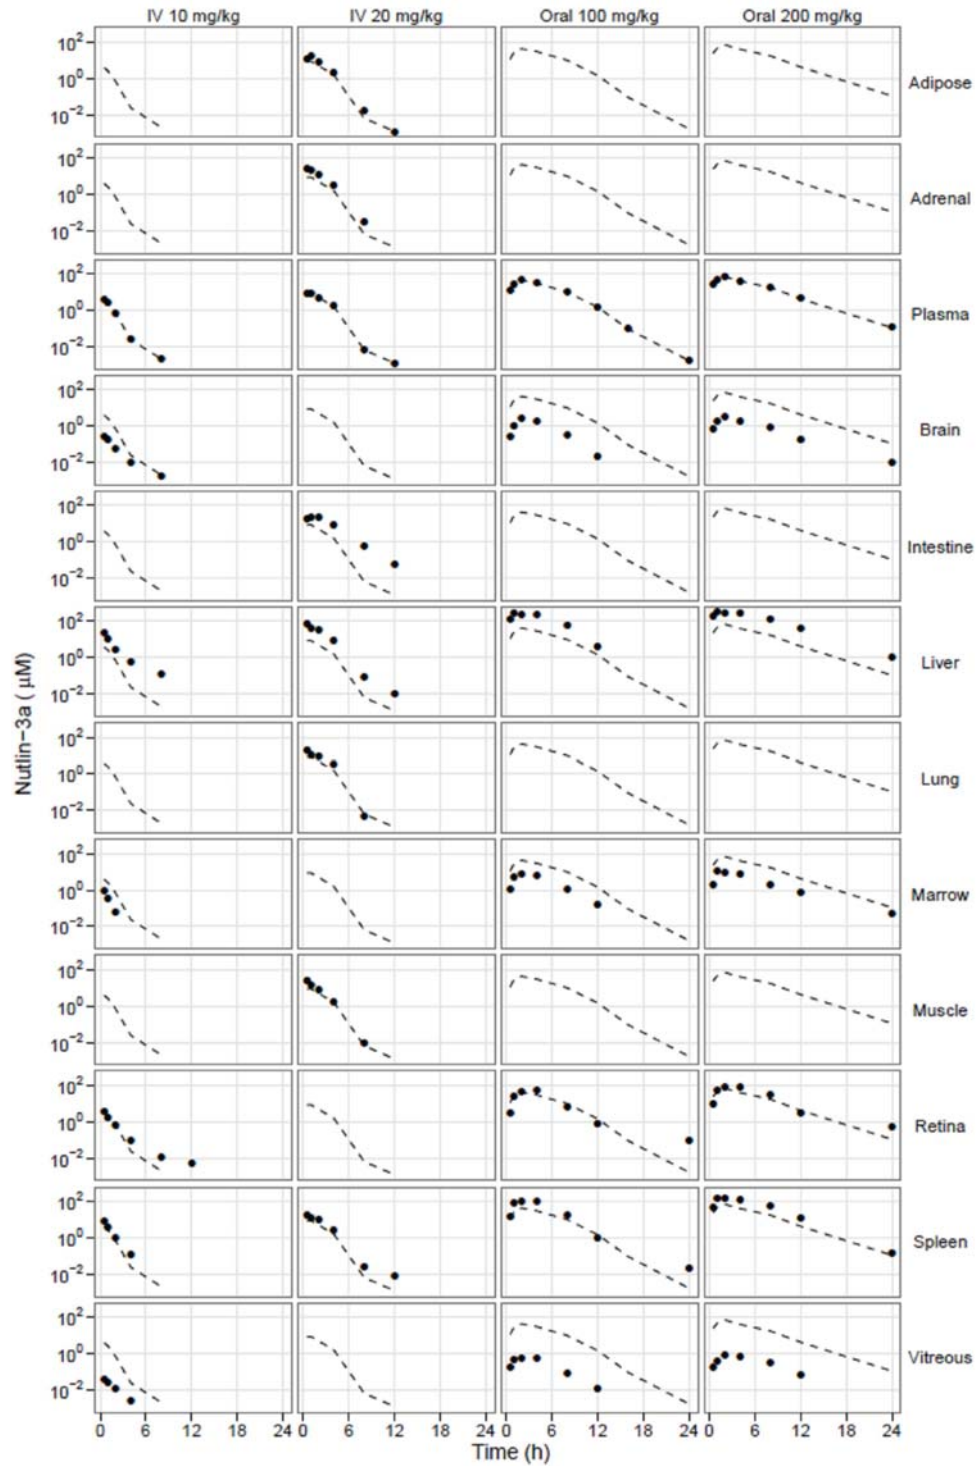

**Supplementary Figure S2.** Comparison of actual plasma and tissue concentrations of nutlin-3a. The median plasma concentrations are shown in each box as the dashed line and the symbols represent the median tissue concentrations. This plot allows visualization of tissue concentrations relative to plasma.

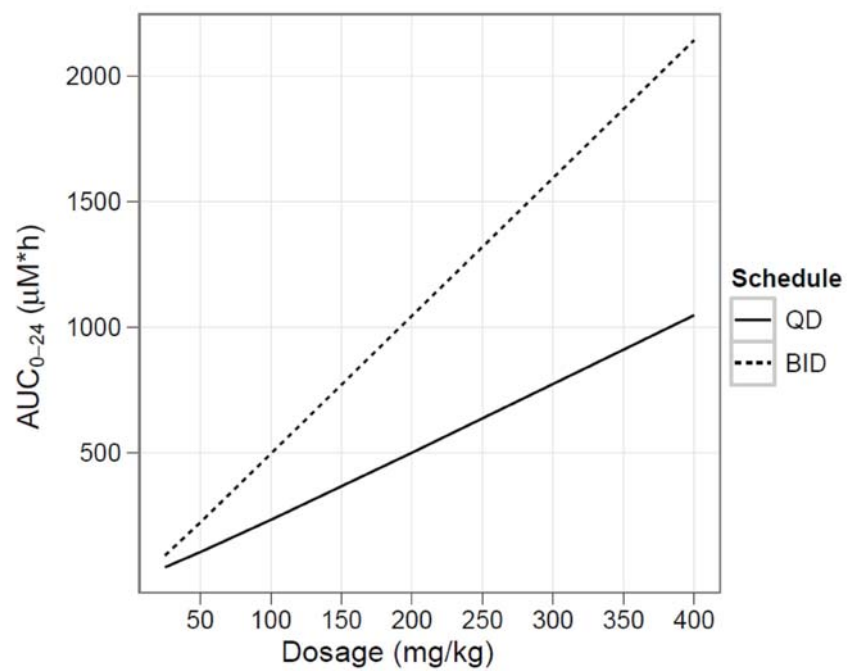

**Supplementary Figure S3.** Plasma area under the concentration-time curve for 24 h at steady state (AUC<sub>0-24</sub>) versus nutlin-3a dosage when administered once daily (QD) and twice daily (BID). AUCs were calculated from simulated concentration-time curves based on the final PBPK model.

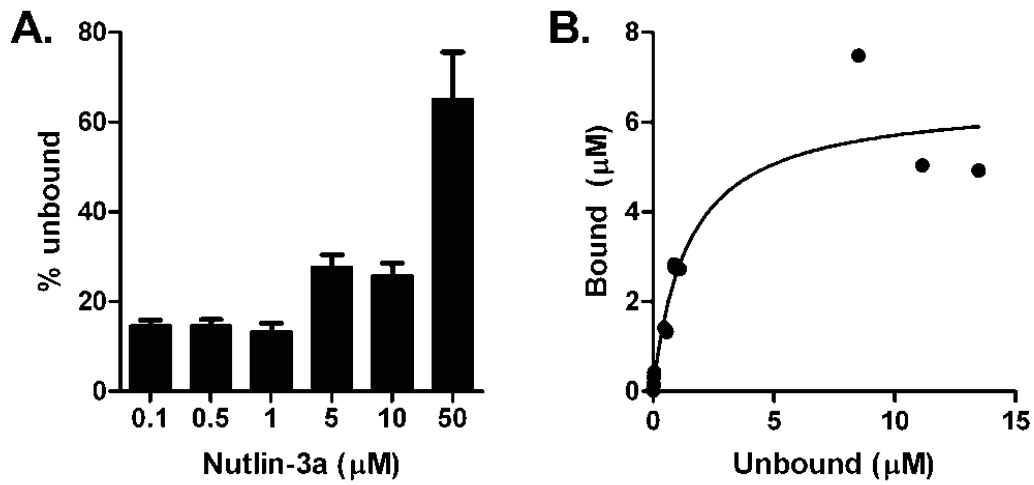

**Supplementary Figure S4.** Nutlin-3a binding to cell culture media. Bound and unbound nutlin-3a plasma concentrations were determined with equilibrium dialysis. (A) The unbound fraction is shown with increasing total nutlin-3a concentrations. Bars represent the mean and error bars represent the standard deviation for one experiment performed in triplicate. (B) Nonlinear regression was used to fit a binding model (Langmuir equation) to the data.

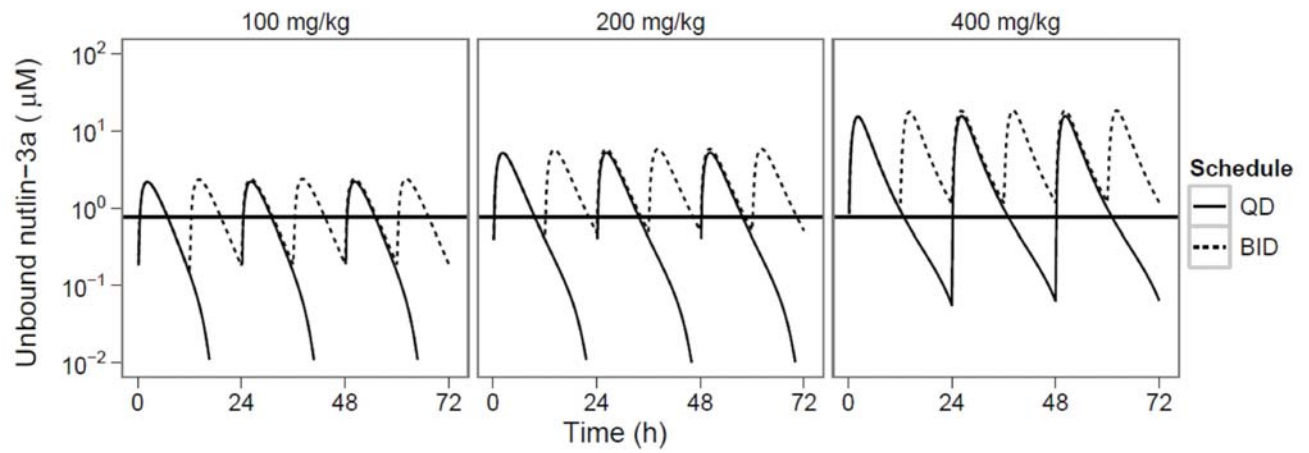

**Supplementary Figure S5.** Simulated concentration-time plot of unbound nutlin-3a in the adrenal gland after multiple oral doses given once daily (QD) or twice daily (BID). The horizontal lines represent the unbound IC<sub>50</sub> of nutlin-3a for IMR-32 p53-wt neuroblastoma cells.

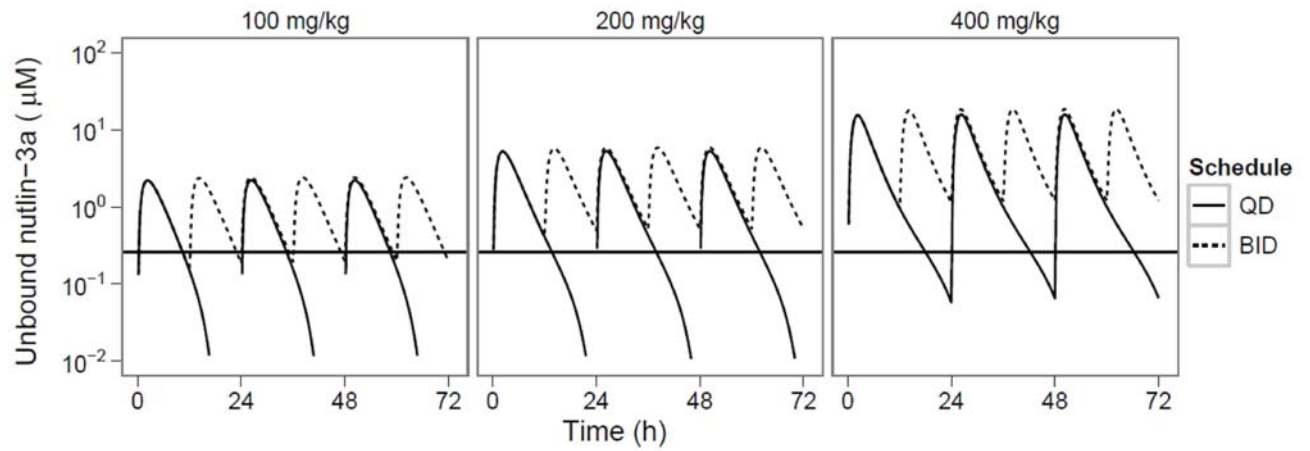

**Supplementary Figure S6.** Simulated concentration-time plot of unbound nutlin-3a in the muscle after multiple oral doses given once daily (QD) or twice daily (BID). The horizontal lines represent the unbound IC<sub>50</sub> of nutlin-3a for RMS-YM rhabdomyosarcoma cells.

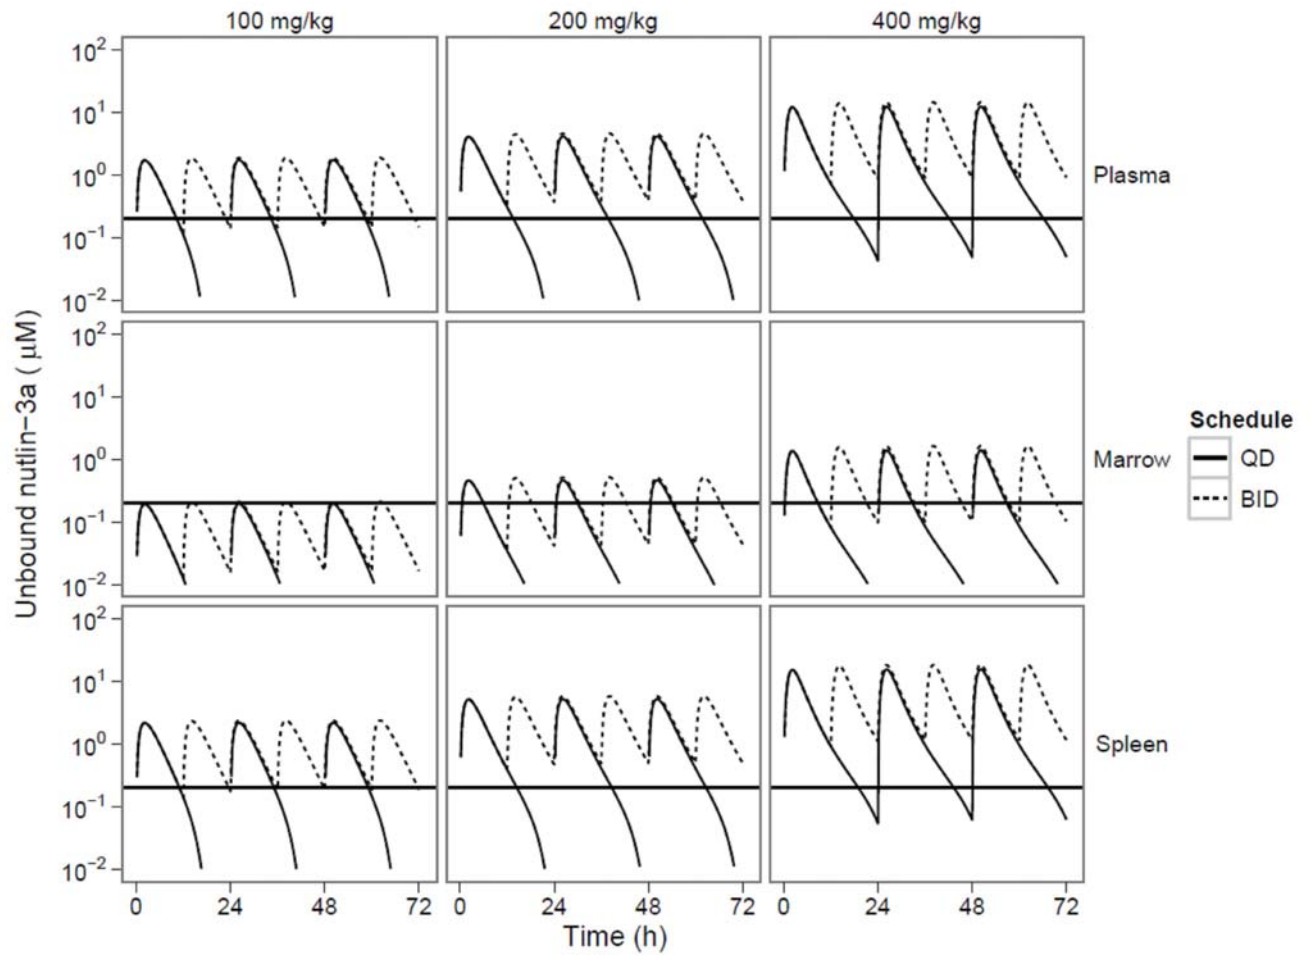

**Supplementary Figure S7.** Simulated concentration-time plot of unbound nutlin-3a in the plasma, bone marrow, and spleen after multiple oral doses given once daily (QD) or twice daily (BID). The horizontal lines represent the unbound IC<sub>50</sub> of nutlin-3a for MDM2-overexpressing primary acute lymphoblastic leukemia cells.



**Supplementary Table 1.** Nutlin-3a IC<sub>50</sub> for cell survival in different cell types

| Cell type                       | IC <sub>50</sub><br>( $\mu$ M) | Unbound<br>IC <sub>50</sub> ( $\mu$ M) | Exposure<br>time | Reference                |
|---------------------------------|--------------------------------|----------------------------------------|------------------|--------------------------|
| Weri1 retinoblastoma            | 1.1                            | 0.21                                   | 72 h             | Unpublished <sup>a</sup> |
| IMR-32 neuroblastoma            | 3.02                           | 0.77                                   | 72 h             | (Barbieri et al., 2006)  |
| RMS-YM rhabdomyosarcoma         | 1.25 <sup>b</sup>              | 0.26                                   | 48 h             | (Miyachi et al., 2009)   |
| Primary MDM2-overexpressing ALL | 1.0 <sup>b</sup>               | 0.20                                   | 44 h             | (Gu et al., 2008)        |

<sup>a</sup>Mike Dyer, St. Jude Children's Research Hospital, Memphis, TN

<sup>b</sup>Nutlin-3a IC<sub>50</sub> assumed to be half of racemic nutlin-3 IC<sub>50</sub>

**Supplementary Table 2.** Percent time unbound tissue concentration is above unbound IC<sub>50</sub>

| Cell line | Tissue   | Time above IC <sub>50</sub> (%) |     |     |     |     |     |
|-----------|----------|---------------------------------|-----|-----|-----|-----|-----|
|           |          | QD                              |     |     | BID |     |     |
|           |          | 100                             | 200 | 400 | 100 | 200 | 400 |
| Weri1     | Retina   | 38                              | 53  | 70  | 83  | 100 | 100 |
|           | Vitreous | 0                               | 0   | 5   | 0   | 0   | 17  |
| IMR32     | Adrenal  | 27                              | 39  | 54  | 58  | 85  | 100 |
| RMS-YM    | Muscle   | 43                              | 58  | 76  | 92  | 100 | 100 |
| ALL       | Plasma   | 43                              | 57  | 75  | 90  | 100 | 100 |
|           | Spleen   | 46                              | 61  | 80  | 90  | 100 | 100 |
|           | Marrow   | 0                               | 23  | 35  | 12  | 48  | 77  |
